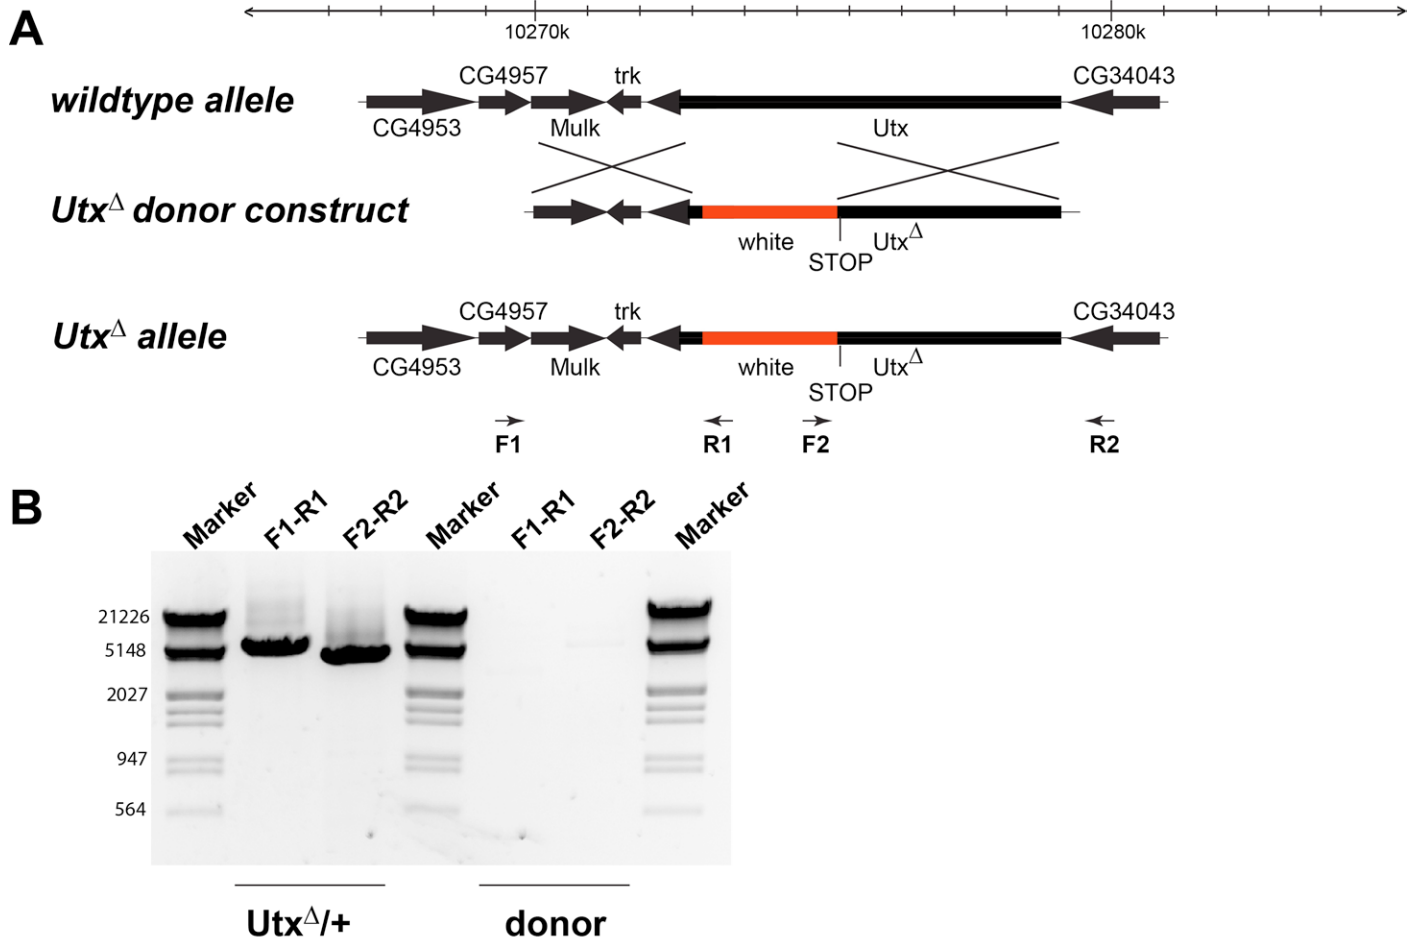

**Fig. S1. Molecular analysis of the *Utx*<sup>Δ</sup> allele generated by homologous recombination.** (A) The genomic region containing the *Utx* gene in wild-type animals (*Utx*<sup>+</sup> allele); the targeting construct containing the indicated genomic region in which part of the *Utx* coding region was replaced by the *white* (*w*<sup>+</sup>) marker gene (donor fragment); and the deletion allele in which part of the *Utx* coding region is replaced by *w*<sup>+</sup> (*Utx*<sup>Δ</sup> allele). In *Utx*<sup>Δ</sup>, the AGC codon for Ser503 was converted to a TAA termination codon. The positions of primers F1 (5'-CCAAGCCCAGCAACCGATTC-3'), R1 (5'-TCGCTGCATGAATTAGCTTGG-3'), F2 (5'-TGCCGTTTACTGTGCGAC-3') and R2 (5'-TATCGTTTCGCTCGGAAAGC-3') used for diagnostic PCR are shown. (B) PCR reactions were performed with the indicated primer pairs on genomic DNA isolated from *Utx*<sup>Δ/+</sup> heterozygotes or from transgenic animals carrying the donor construct (donor) and analysed by electrophoresis on agarose gels. The 5 kb F1-R1 and F2-R2 fragments are diagnostic for the *Utx*<sup>Δ</sup> allele.
